# Supplementary material for: A Self-Powered High-Responsivity, Fast-Response-Speed Solar-Blind Ultraviolet Photodetector Based on CuO/β-Ga2O3 Heterojunction with Built-In Potential Control
Source: MDPI journal article supplement (doi:10.3390/nano13050954), 2023-03-06
Supplement: s1 [file s1]

*Article*

# **A Self-Powered High-Responsivity, Fast-Response-Speed Solar-Blind Ultraviolet Photodetector Based on CuO/ $\beta$ -Ga<sub>2</sub>O<sub>3</sub> Heterojunction with Built-In Potential Control**

**Sangbin Park, Younghwa Yoon, Hyungmin Kim, Taejun Park, Kyunghwan Kim and Jeongsoo Hong \***

Department of Electrical Engineering, College of IT Convergence, Gachon University, 1342, Seongnam-daero, Sujeong-gu, Seongnam-si 13120, Gyeonggi-do, Republic of Korea;  
tkdrns7@naver.com (S.P.); yh7290@naver.com (Y.Y.); kjf9252@gmail.com (H.K.);  
mkn12123@naver.com (T.P.);  
khkim@gachon.ac.kr (K.K.)

\* Correspondence: hongjs@gachon.ac.kr

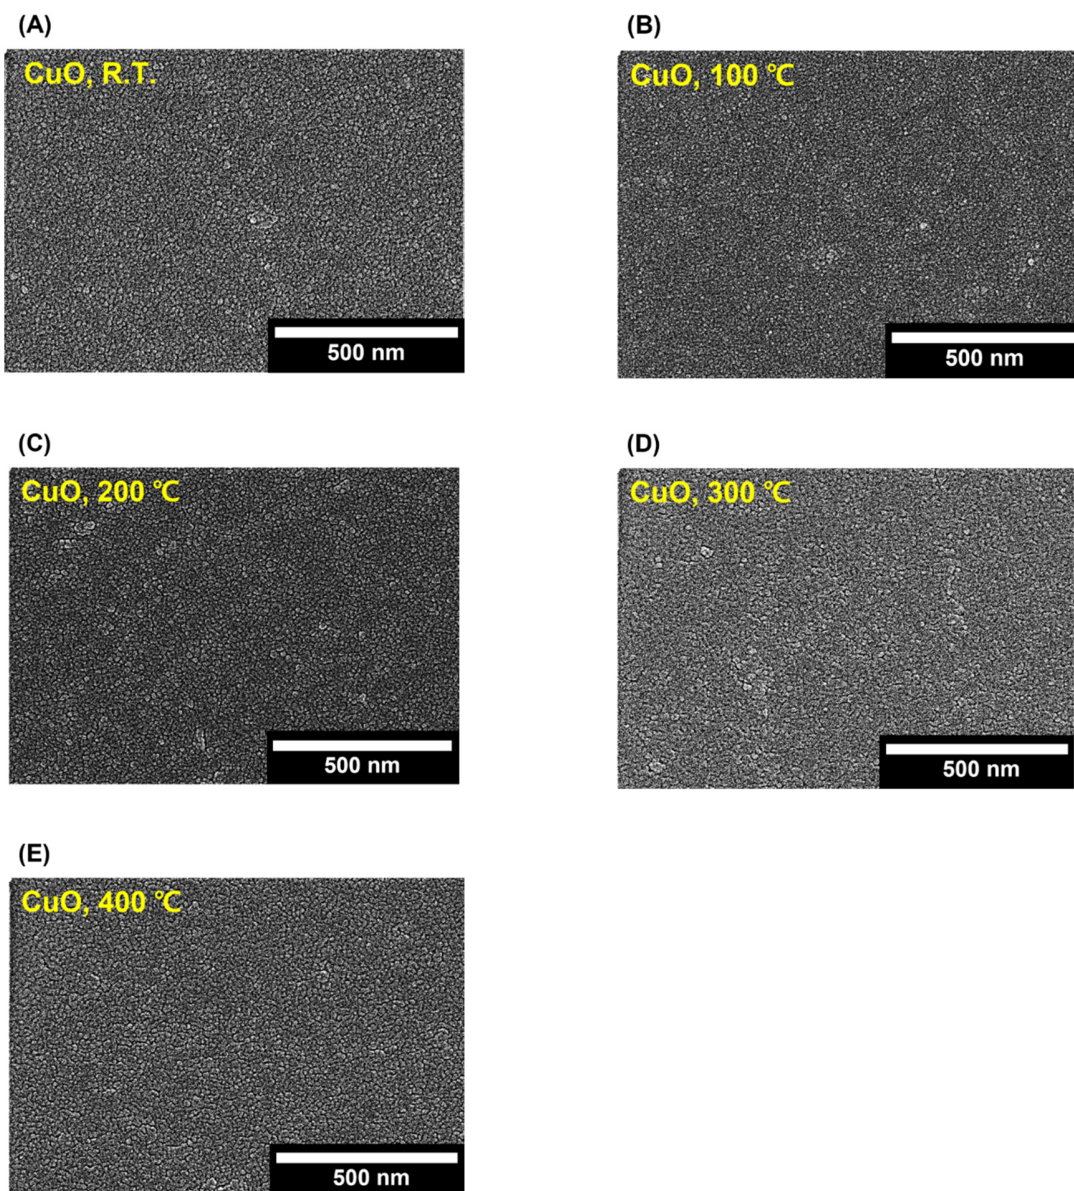

Figure S1. SEM images of surface morphology of CuO film deposited on the glass substrate, The plan-view images of a) as-fabricated CuO film at room temperature and post-annealed at b) 100 °C; c) 200 °C; d) 300 °C; e) 400 °C.

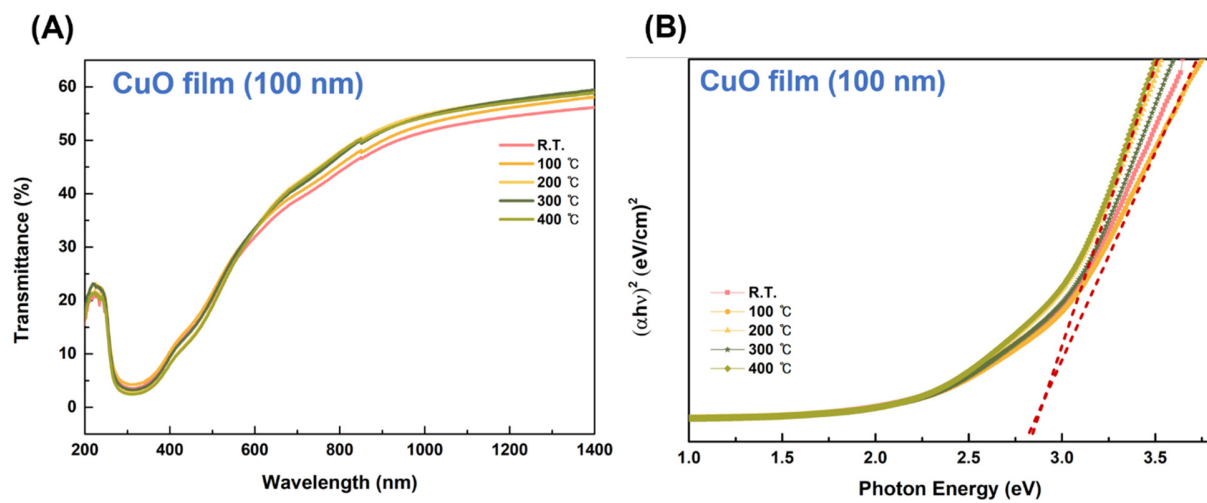

Figure S2. The optical properties of the as-fabricated CuO film at room temperature and different post-annealing temperatures, which deposited on the glass substrate. (a) The transmittance and (b) optical band gap energy of as-fabricated CuO films at room temperature and different post-annealing temperatures.

Table S1. The optical and electrical properties for the CuO film and  $\beta$ -Ga<sub>2</sub>O<sub>3</sub> wafer.

| Parameter                   | Properties |                                         |
|-----------------------------|------------|-----------------------------------------|
| Layer                       | CuO        | $\beta$ -Ga <sub>2</sub> O <sub>3</sub> |
| Optical bandgap energy (eV) | 2.80       | 4.80                                    |
| Work function (eV)          | 6.55       | 5.65                                    |
| Electron affinity (eV)      | 5.02       | 4.00                                    |

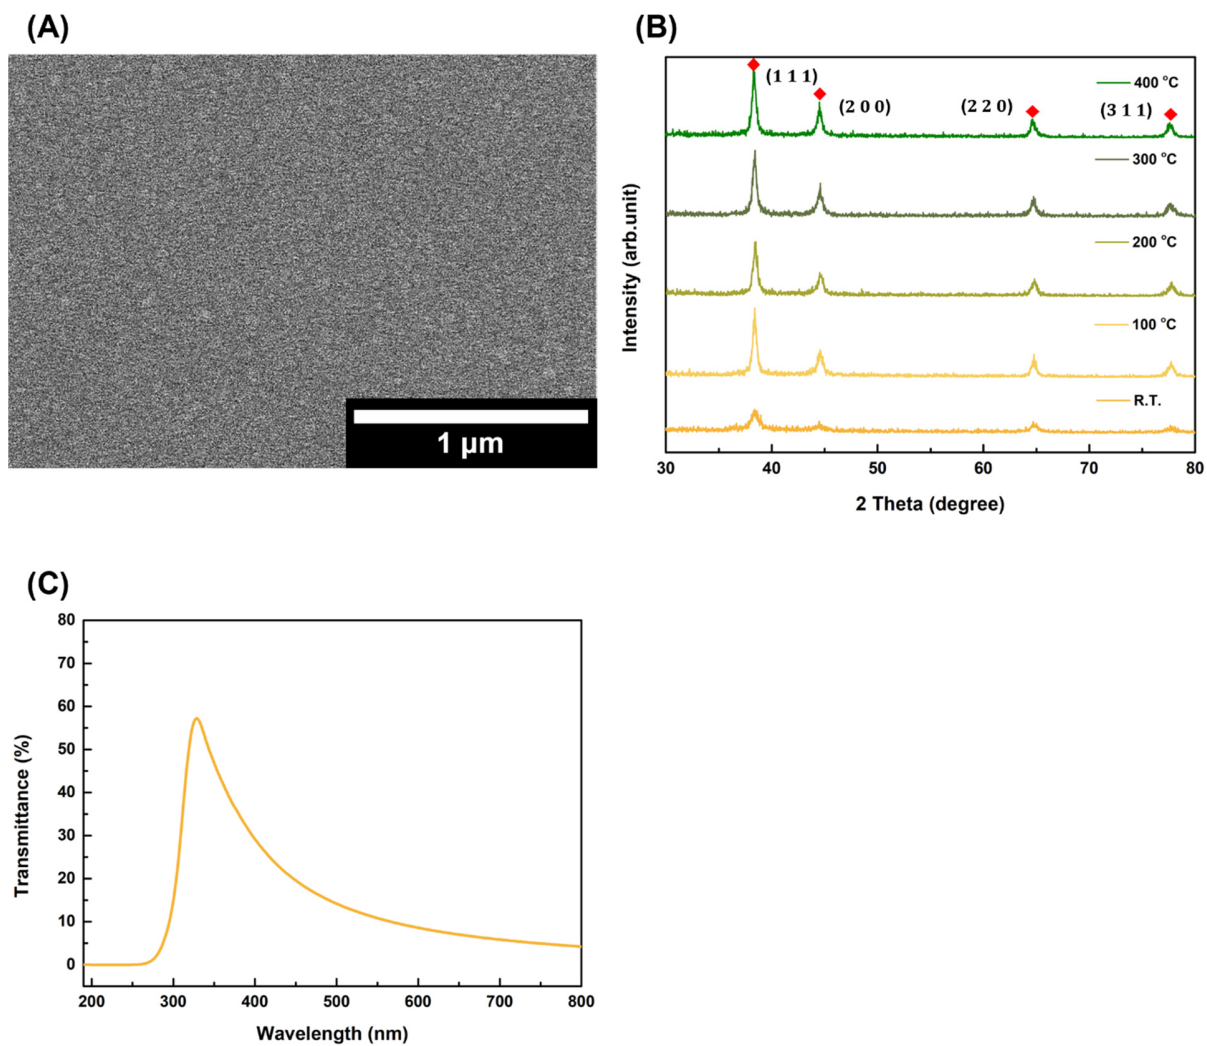

Figure S3. The structural and optical properties of 20-nm Ag electrode deposited on the glass substrate. (a) SEM plan-view images of 20-nm Ag electrode. (b) XRD pattern of 20-nm Ag thin film at room temperature and different post-annealing temperatures. (c) The transmittance of Ag electrode deposited on the glass substrate.

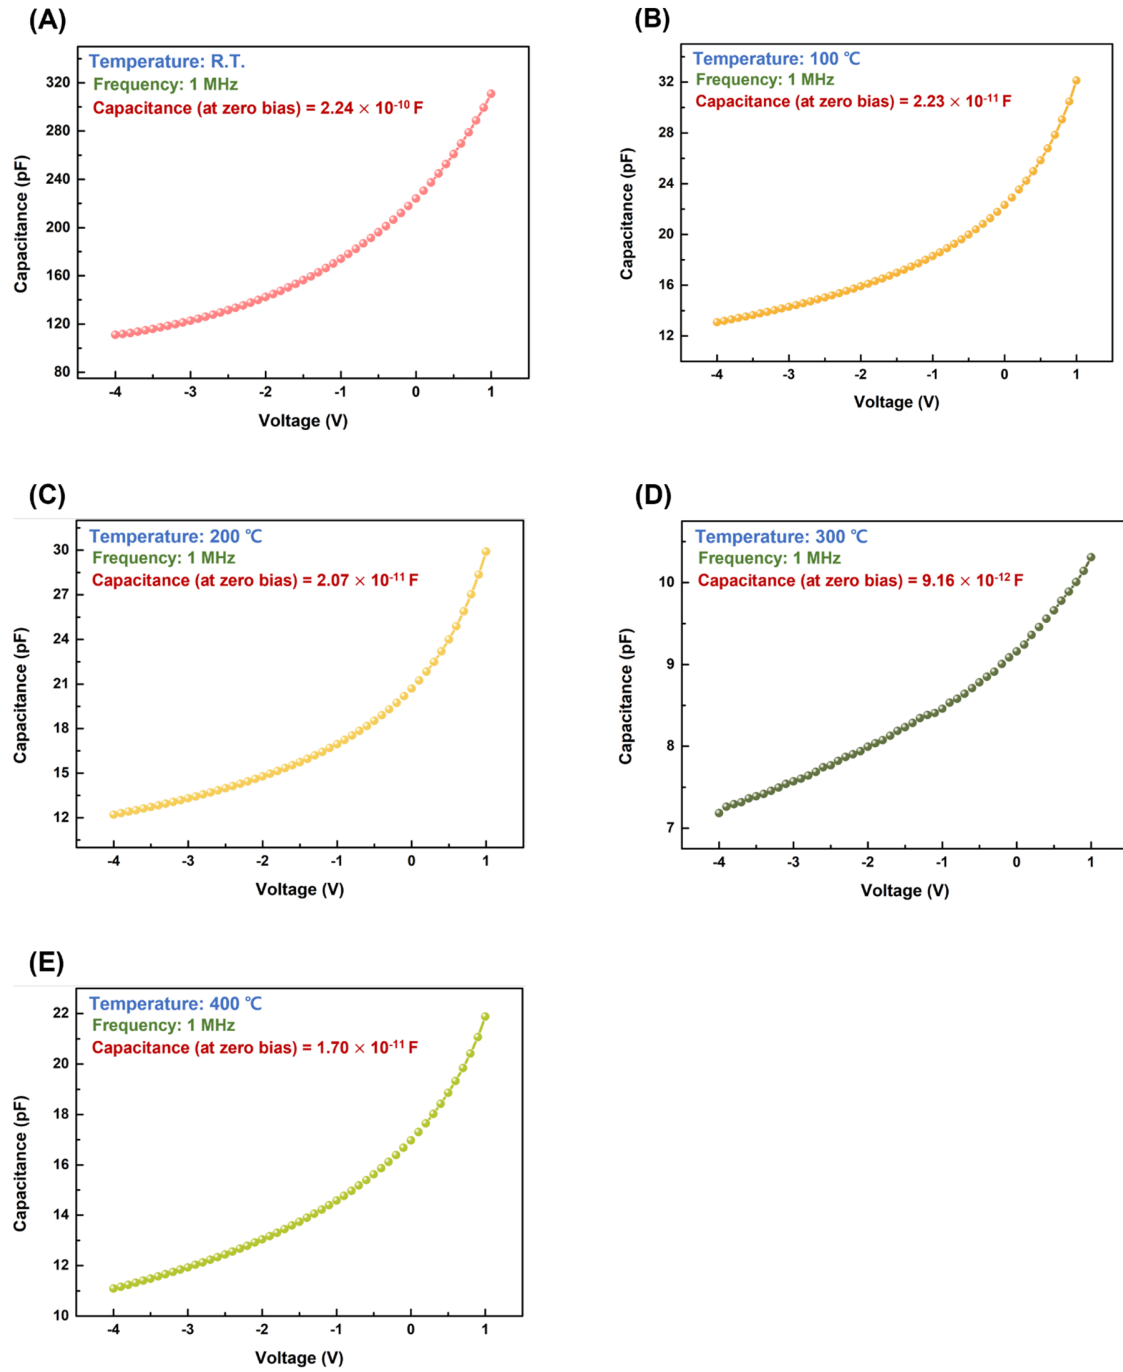

Figure S4. Capacitance-voltage (C-V) characteristic of as-fabricated photodetector at (a) room temperature and devices post-annealed at (b) 100 °C; (c) 200 °C; (d) 300 °C; (e) 400 °C ranging from -4 V to 1 V.

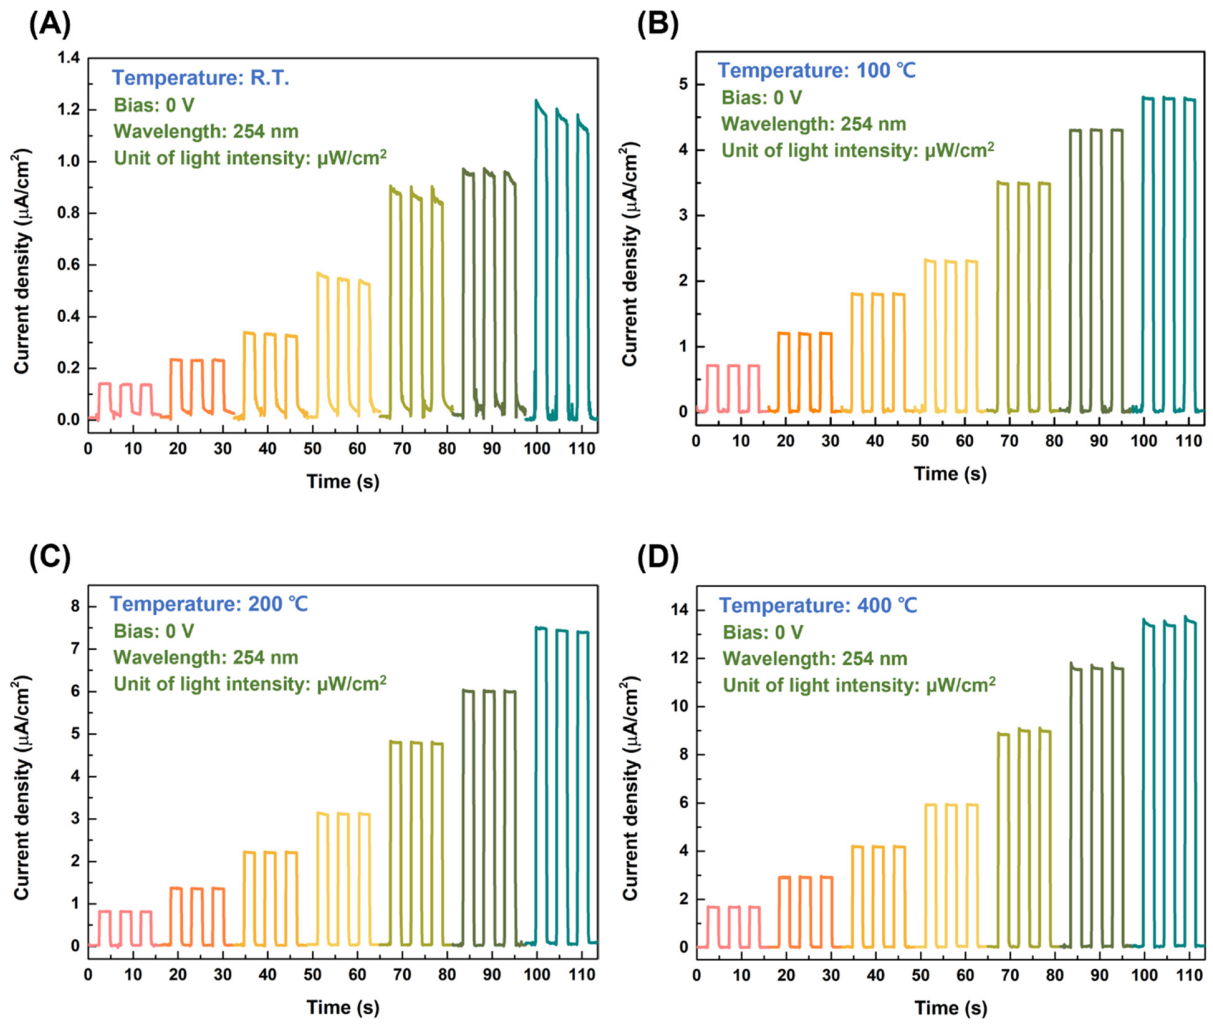

Figure S5. Time-dependent photocurrent density characteristic of as-fabricated photodetector at (a) room temperature and post-annealed at (b) 100 °C; (c) 200 °C; (d) 400 °C under 254-nm solar-blind UV light with various light intensities.

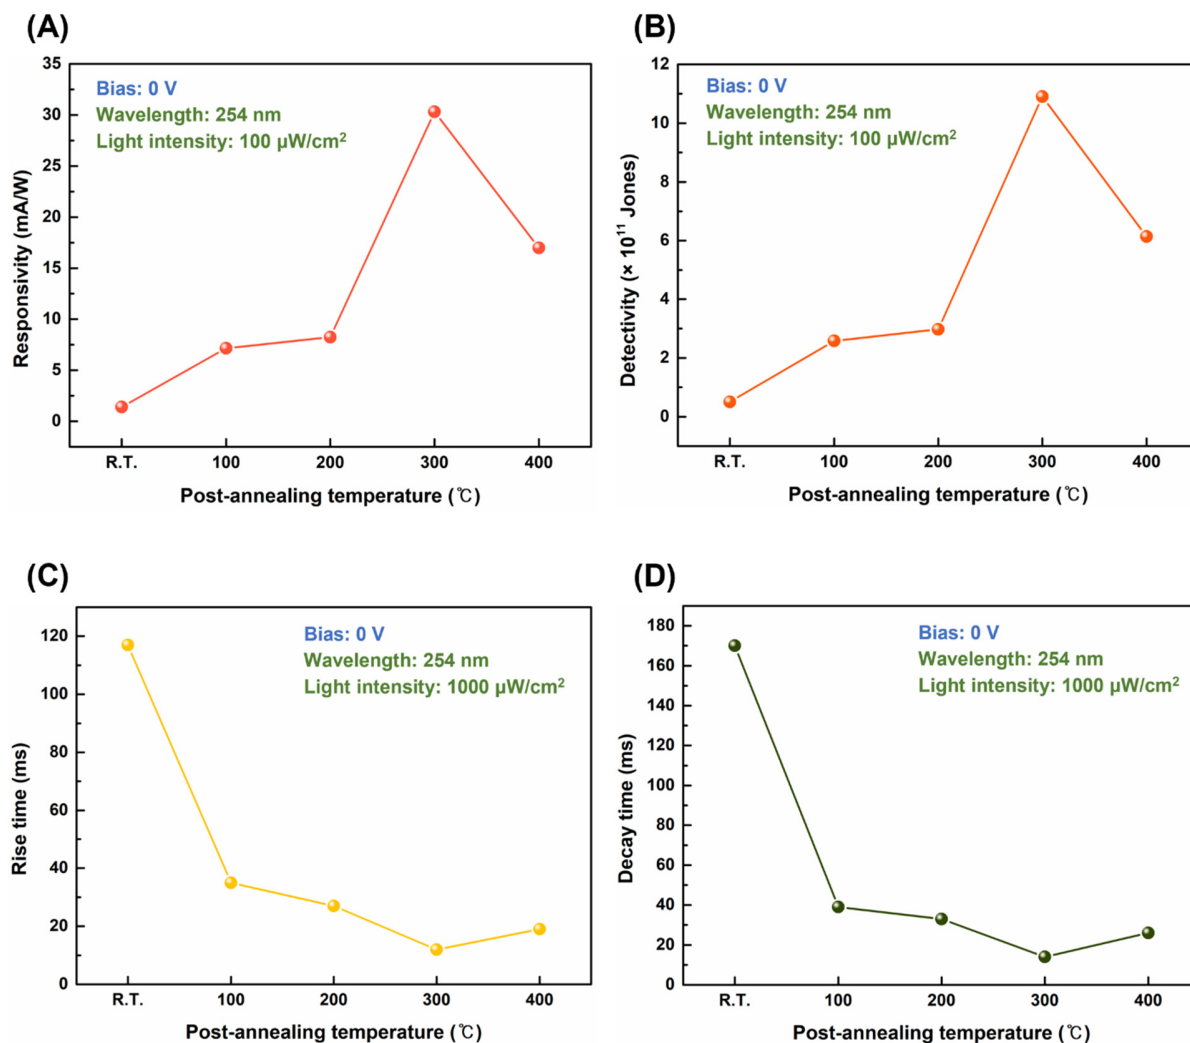

Figure S6. The post-annealing temperature-dependent (a) responsivity and (b) detectivity of the photodetector under 254-nm UV light with a  $100 \mu\text{W}/\text{cm}^2$  light intensity; (c) Rise time and (d) decay time of the photodetector with different post-annealing temperatures under 254-nm UV light with a  $1000 \mu\text{W}/\text{cm}^2$  light intensity



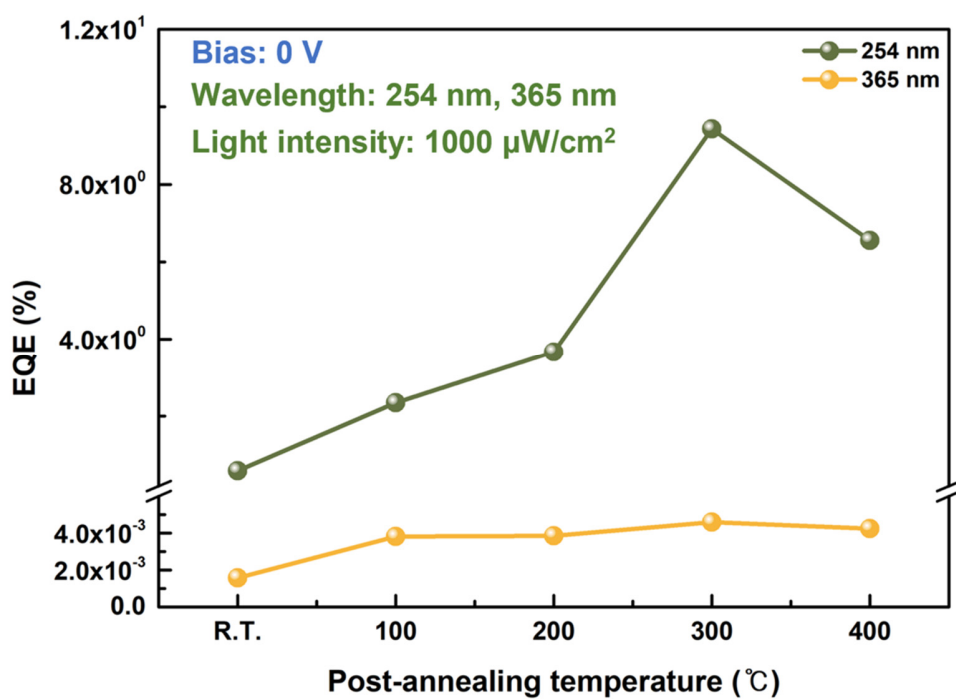

Figure S7. The post-annealing temperature-dependent EQE under the 254-nm solar-blind UV and 365-nm UV-A light with a 1000  $\mu\text{W}/\text{cm}^2$  light intensity.

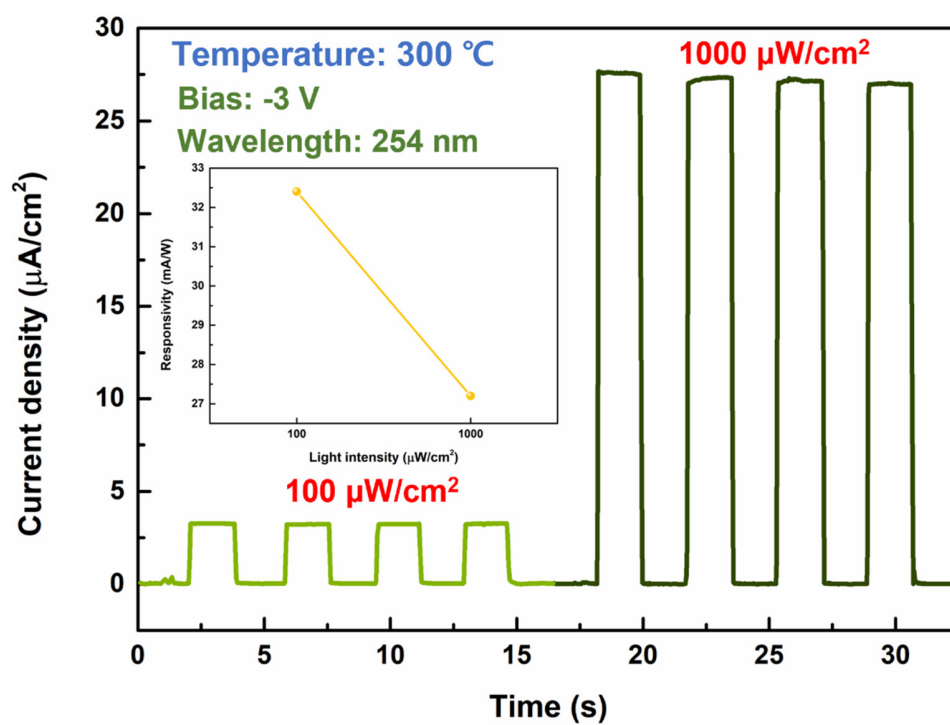

Figure S8. Time-dependent photocurrent density characteristics and responsivity of photodetector post-annealed at 300 °C under 254-nm solar-blind UV light with light intensity of 100  $\mu\text{W}/\text{cm}^2$  and 1000  $\mu\text{W}/\text{cm}^2$ .
